# Supplementary material for: HIV-Exposed Uninfected Infants Show Robust Memory B-Cell Responses in Spite of a Delayed Accumulation of Memory B Cells: an Observational Study in the First 2 Years of Life
Source: PubMed Central journal article supplement (PMC4933775; doi:10.1128/cvi.00149-16), 2016-07-05
Supplement: CVI.00149-16_zcd999095367so1.pdf [file CVI.00149-16_zcd999095367so1.pdf]

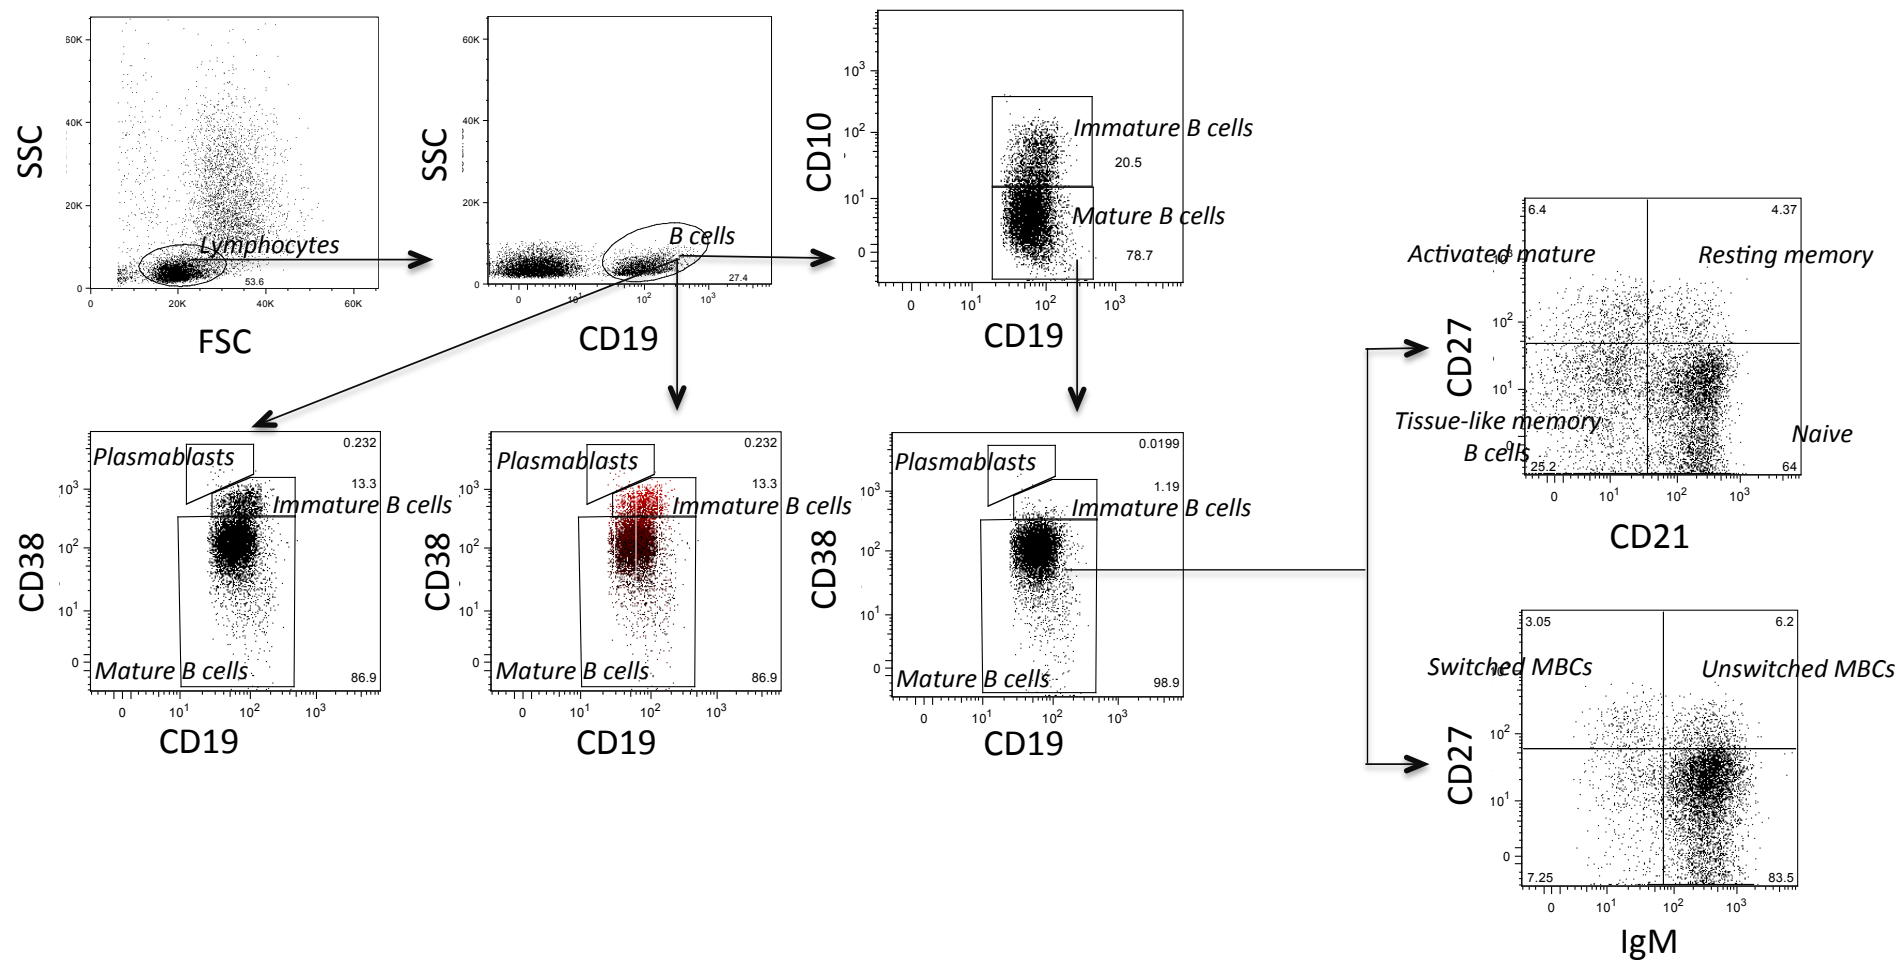

Fig S1

1 **Supplementary Figure 1:**

2 Gating strategy for the distribution of B-cell subsets by multiparametric flow cytometry  
3 based on the combination of surface markers as indicated. B cells; CD19<sup>+</sup>, plasmablasts;  
4 CD19<sup>+</sup>CD38<sup>hi</sup>CD10<sup>-</sup>, mature B cells; CD19<sup>+</sup>CD38<sup>lo</sup>CD10<sup>-</sup>, naïve B cells; CD19<sup>+</sup>CD10<sup>-</sup>  
5 CD27<sup>-</sup>CD21<sup>+</sup>, resting MBCs; CD19<sup>+</sup>CD10<sup>-</sup>CD27<sup>+</sup>CD21<sup>+</sup>, activated B cells; CD19<sup>+</sup>CD10<sup>-</sup>  
6 CD27<sup>+</sup>CD21<sup>-</sup>, tissue-like MBCs; CD19<sup>+</sup>CD10<sup>-</sup>CD27<sup>-</sup>CD21<sup>-</sup>, switched MBCs;  
7 CD19<sup>+</sup>CD10<sup>-</sup>CD27<sup>+</sup>IgM<sup>-</sup>, unswitched MBCs; CD19<sup>+</sup>CD10<sup>-</sup>CD27<sup>+</sup>IgM<sup>+</sup>. \*Gating on the  
8 CD10<sup>-</sup>CD19<sup>+</sup> population excludes the immature B cells (CD38<sup>+</sup>CD19<sup>+</sup>CD10<sup>+</sup>) as  
9 confirmed by the polychromatic plot CD10<sup>+</sup> cells (red dots). MBCs: memory B cells.

10

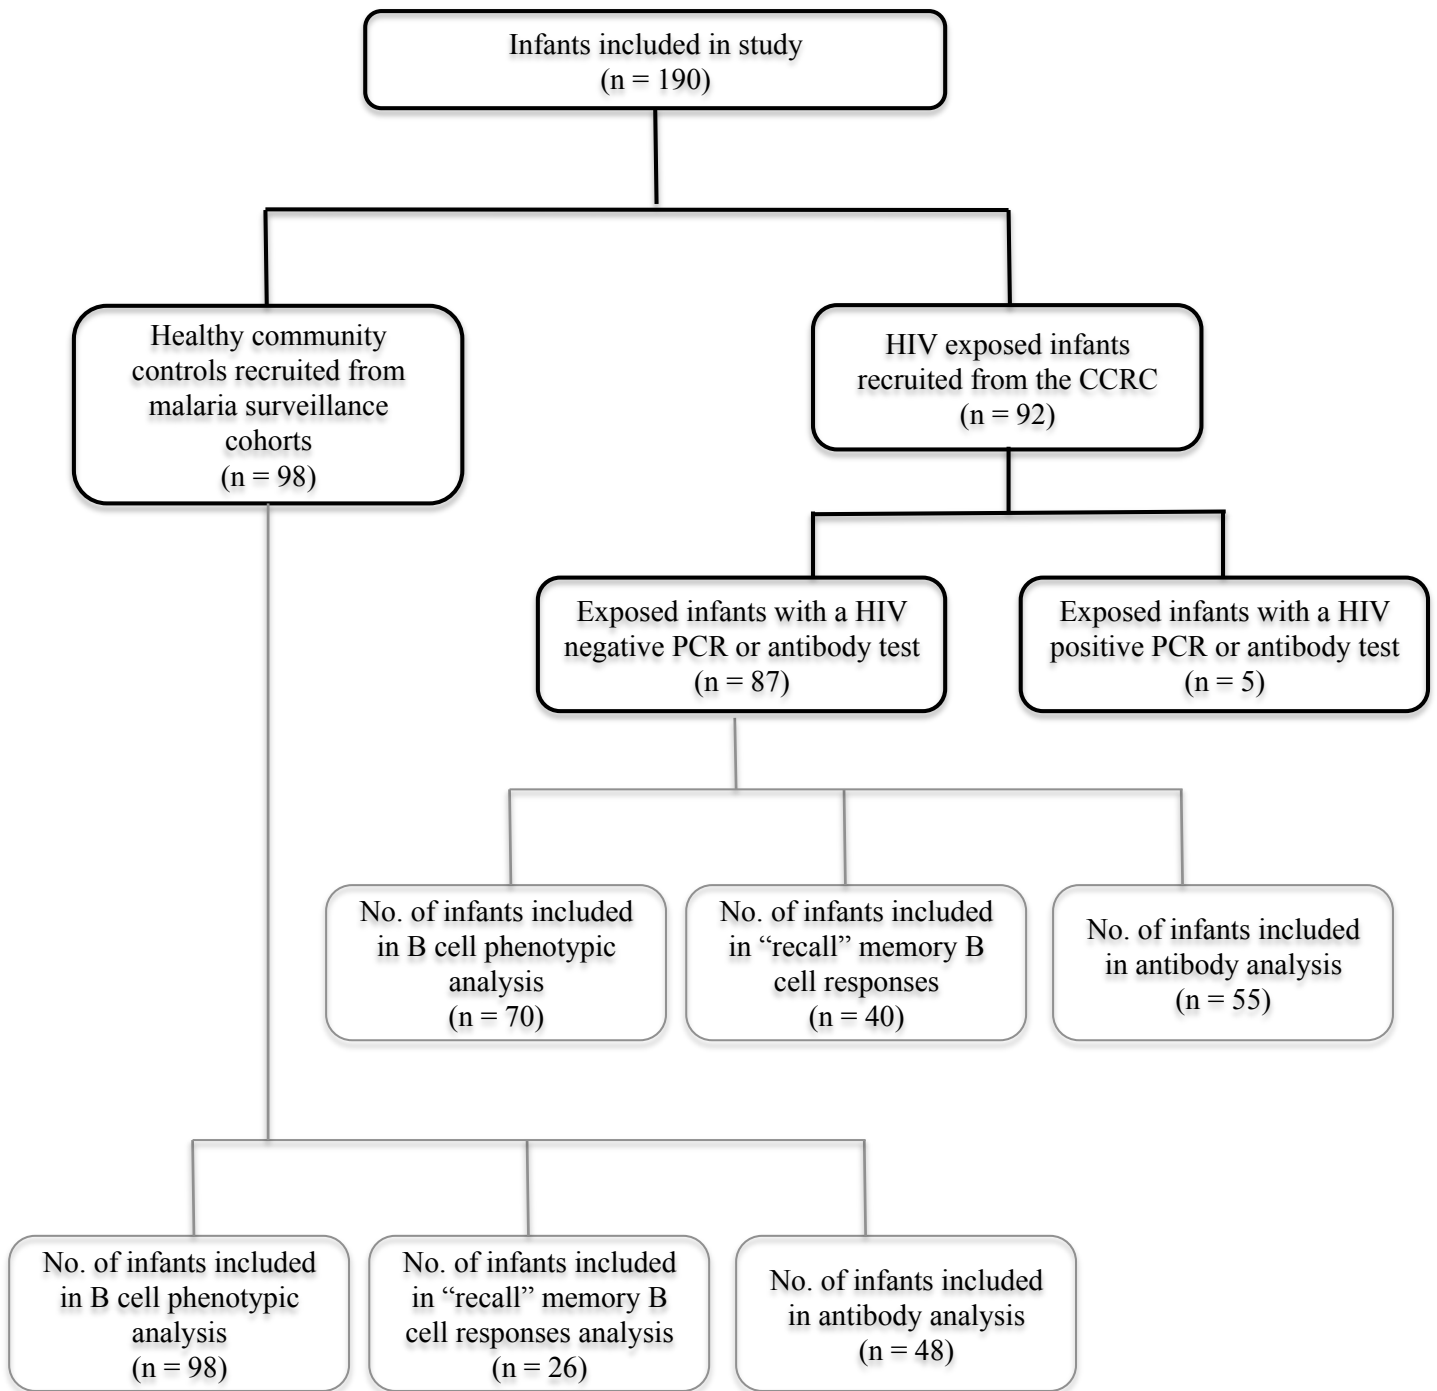

Fig S2

1 **Supplementary Figure 2**

2 **Infant recruitment and numbers of infants included in the B cell phenotypic**  
3 **analysis, recall/memory B cell analysis and antibody level analysis.**

4 A total of 190 infants were included in the study, healthy community controls (n = 98)  
5 and HIV exposed infants (n = 92). Five of the HIV exposed infants were HIV positive  
6 and excluded from subsequent assays. Of the 87 HEUs who were negative for HIV, 70  
7 were included in B cell phenotypic assays, a subset of these infants, 40 and 55 were also  
8 included in the recall/memory B cell assay and antibody concentration assays  
9 respectively. Amongst the healthy community controls 98 infants were included in the B  
10 cell phenotypic assays while a subset of these infants, 26 and 48, were included in  
11 recall/memory B cell and antibody assays respectively. Overall 17 HIV exposed  
12 uninfected infants were not included in the immunological assays (phenotypic,  
13 recall/memory and antibody analysis), due to delayed recruitment, but their HIV test  
14 results were used in determining the proportion of HIV exposed infants who tested HIV  
15 positive by PCR or antibody test [5 out of 92 (5.4%)] in our study.

16

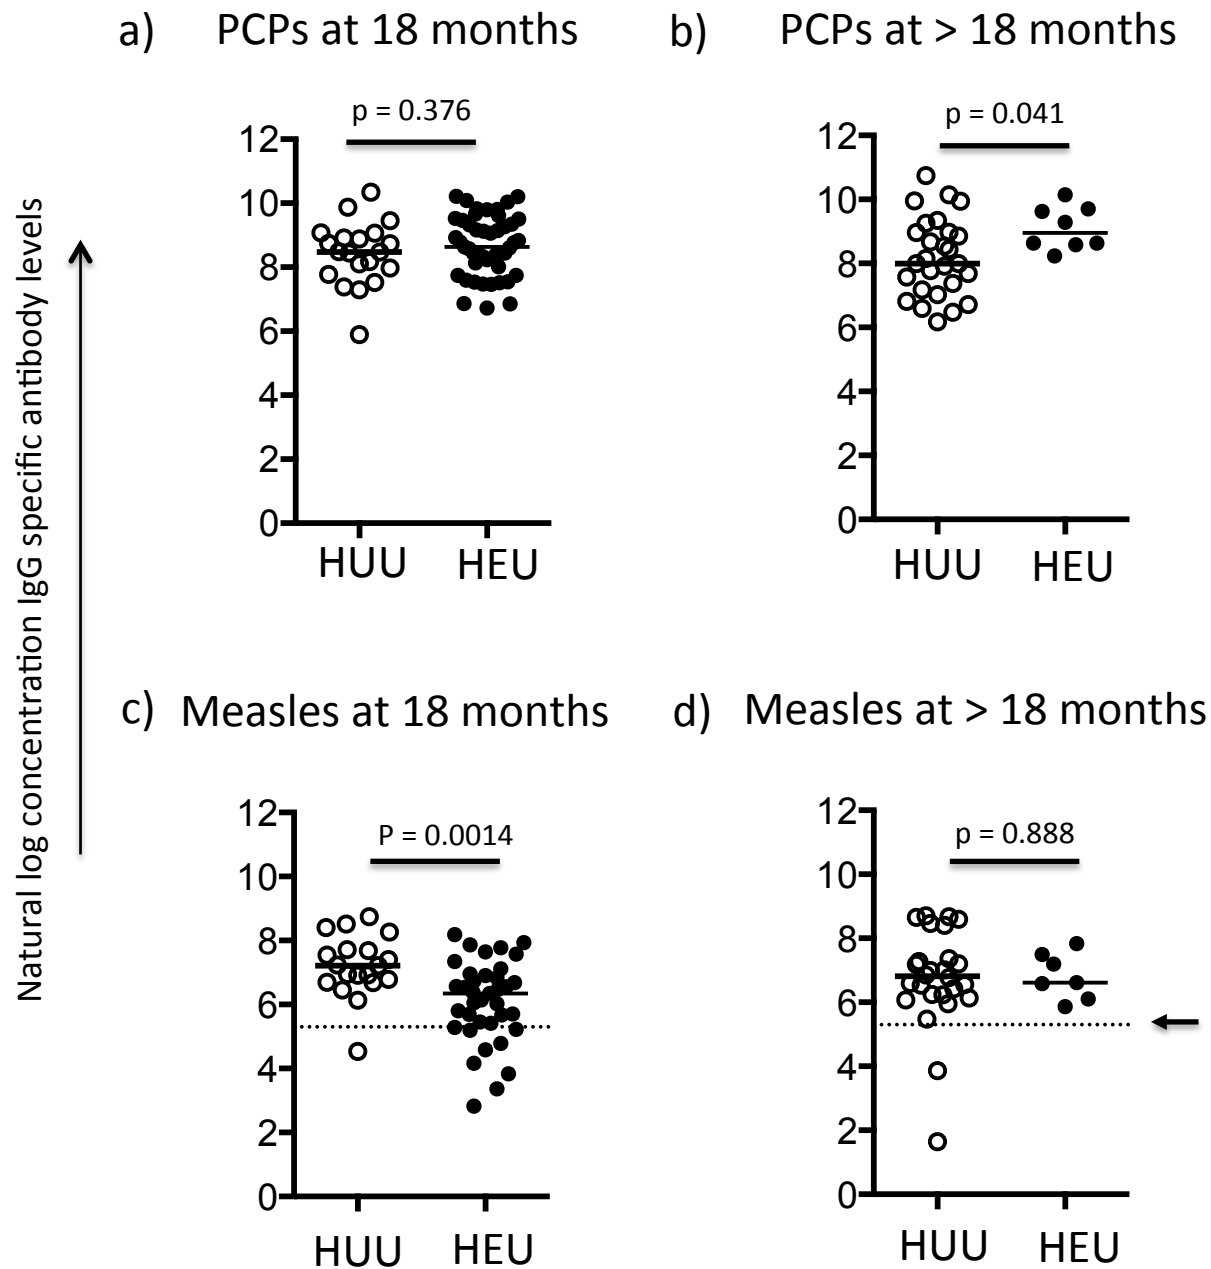

Fig S3

1 **Supplementary Figure 3**

2 **A comparison of anti-pneumococcal capsular polysaccharides (PCPs) and anti-**  
3 **measles antibody levels taken at the 18-month age-category and after 18 months**  
4 **(age categories 21 and 24 months).**

5 Antibody levels against a) PCPs taken at 18 months age category, b) against PCPs taken  
6 after 18 months (age-categories 21 and 24 months) c) against measles taken at 18 months  
7 and d) against measles taken after 18 months (age-categories 21 and 24 months).

8 Antibody concentrations were compared between HIV unexposed uninfected infants  
9 (HUU), open circles and HIV exposed uninfected infants (HEU), closed circles.

10 Wilcoxon rank-sum test was used and medians presented. P-values  $< 0.05$  were  
11 considered significant. Arrow and dotted lines indicate cut-off for protective antibody  
12 concentration. Since antibody concentrations were not normally distributed, log  
13 transformed (natural-log) values of arbitrary antibody concentrations (PCPs) and absolute  
14 concentrations (measles (mIU/ml) have been presented.

15

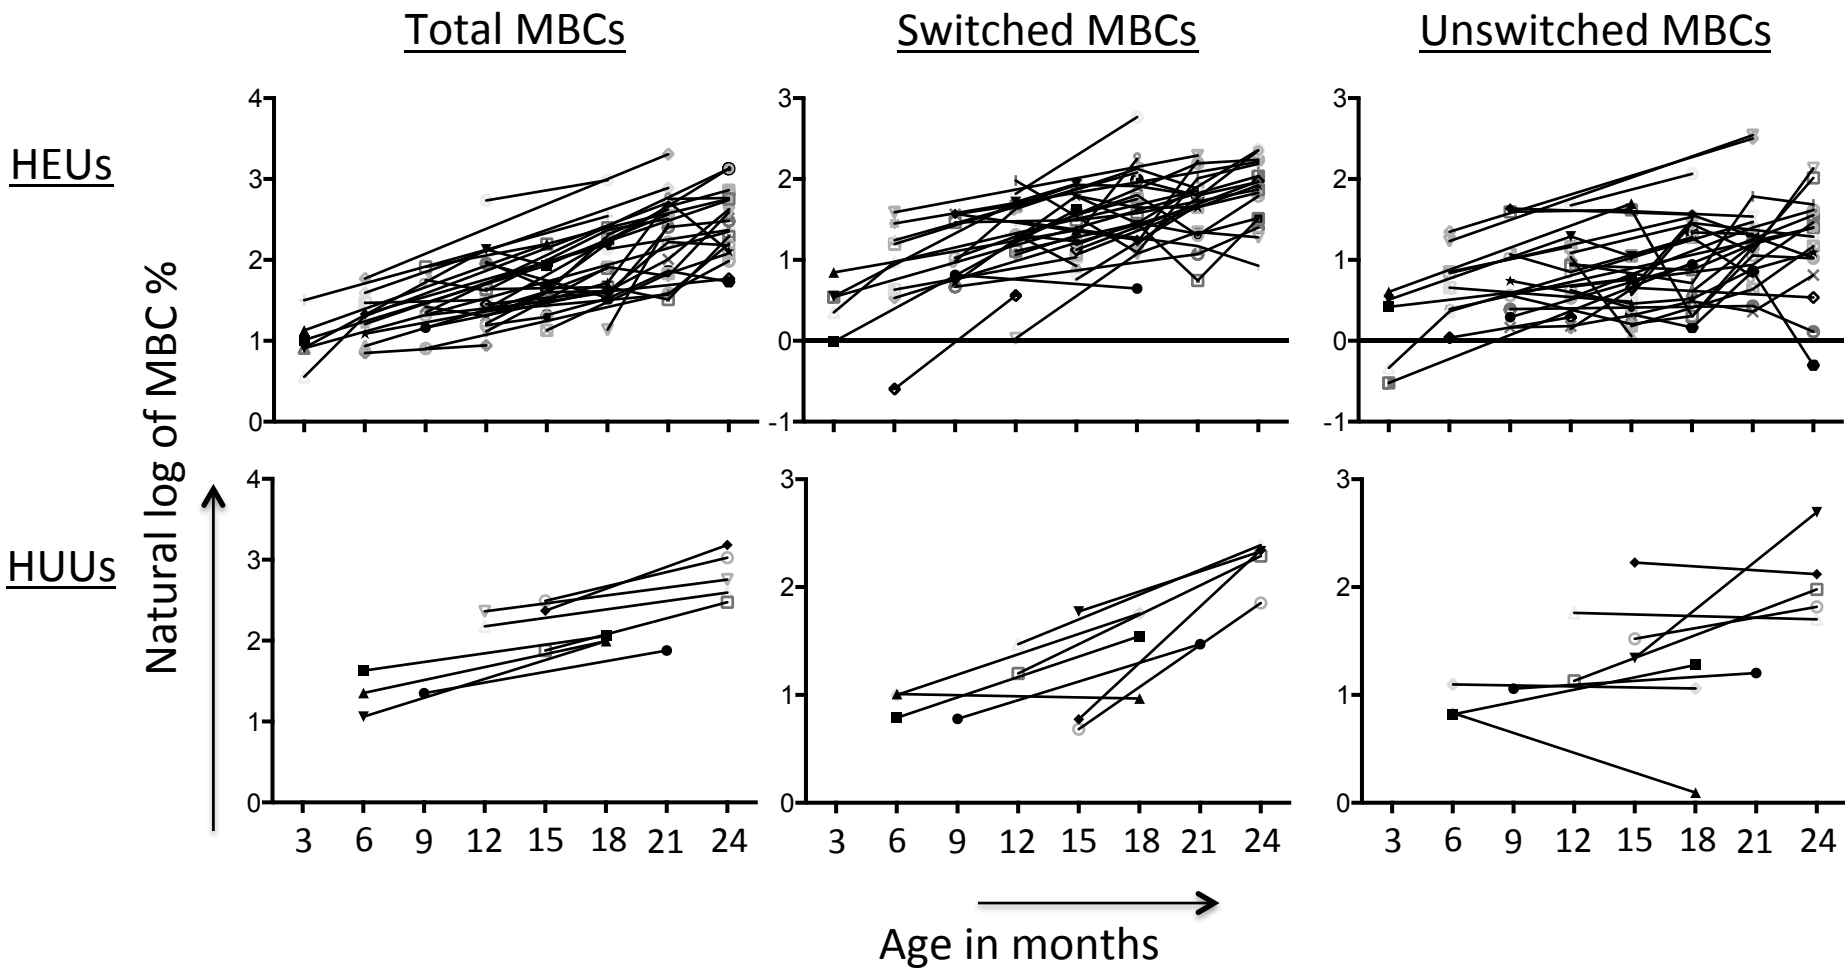

Fig S4

1 **Supplementary Figure 4**

2

3 **Memory B-cell subset kinetics in individual infants during the first two years of life.**

4 Individual infant's kinetics of memory B cell subset; total memory B cells ( $CD19^+CD10^-$

5  $CD27^+$ ), switched memory B cells ( $CD19^+CD10^-CD27^+ IgM^-$ ) and unswitched memory

6 B cells ( $CD19^+CD10^-CD27^+IgM^+$ ) changes with age. In the first row; HIV exposed

7 uninfected infants (HEU) and the second row HIV unexposed uninfected infants (HUU).

8 Each line joins individual infant's MBC subset proportion over time. Y-axis; percentage

9 of memory B cell subsets have been presented as the natural-log of the MBC percentages.

10

11



1

2 Supplementary Table 1: Number of samples used to determine B-cell phenotypes, B-cell  
3 recall/memory responses and serological responses.

|                          |                    | B-cell phenotypic description |                       | B-cell recall responses |          | Antigen specific antibody levels |          |
|--------------------------|--------------------|-------------------------------|-----------------------|-------------------------|----------|----------------------------------|----------|
|                          |                    | HEUs                          | HUUs                  | HEUs                    | HUUs     | HEUs                             | HUUs     |
|                          |                    | (n = 70)                      | (n = 98) <sup>d</sup> | (n = 40)                | (n = 26) | (n = 55)                         | (n = 48) |
| Age categories in months | 3                  | 13                            | 10                    | N/D                     | N/D      | N/D                              | N/D      |
|                          | 6                  | 16                            | 14                    | 6                       | 3        | N/D                              | N/D      |
|                          | 9                  | 16                            | 16                    | 9                       | 2        | N/D                              | N/D      |
|                          | 12                 | 14                            | 15                    | 9                       | 4        | N/D                              | N/D      |
|                          | 15                 | 18                            | 10                    | 7                       | 7        | N/D                              | N/D      |
|                          | 18                 | 23                            | 13                    | 9                       | 7        | 47                               | 20       |
|                          | 21                 | 19                            | 12                    | 10                      | 3        | 5                                | 22       |
|                          | 24                 | 21                            | 17                    | 14                      | 3        | 3                                | 6        |
|                          | Total <sup>c</sup> | 140                           | 107 <sup>d</sup>      | 64                      | 29       | 55                               | 48       |

4

5 n = number of infants contributing the samples that were analysed

6 <sup>c</sup> = total number of samples analysed from n infants

7 <sup>d</sup> = 9 community controls were sampled twice, 12 months apart during the annual cross-  
8 sectional bleed.

9 N/D = not determined

10 HEU; HIV exposed uninfected infants born of infected mothers, HUU; HIV unexposed

11 uninfected infants born of uninfected mother

- 1 Supplementary Table 2: The association of maternal data taken within the first four
- 2 months after the infant's birth and at recruitment, with infant's immunological
- 3 outcomes.

|                                                  | Maternal characteristics after infant's birth |              |                       |              |                     |         | Maternal characteristics at infant's recruitment |         |                      |              |                             |              |
|--------------------------------------------------|-----------------------------------------------|--------------|-----------------------|--------------|---------------------|---------|--------------------------------------------------|---------|----------------------|--------------|-----------------------------|--------------|
|                                                  | CD4 count                                     |              | BMI                   |              | HAART use           |         | CD4                                              |         | BMI                  |              | Viraemia                    |              |
|                                                  | Beta Coef (Std Err)                           | P value      | Beta Coef (Std Err)   | P value      | Beta Coef (Std Err) | P value | Beta Coef (Std Err)                              | P value | Beta Coef (Std Err)  | P value      | Beta Coef (Std Err)         | P value      |
| <b>Infants' B cell subsets</b>                   |                                               |              |                       |              |                     |         |                                                  |         |                      |              |                             |              |
| B cells                                          | <b>0.0006 (0.0003)</b>                        | <b>0.039</b> | <b>-0.022 (0.011)</b> | <b>0.058</b> | -0.074 (0.055)      | 0.186   | 5.68e-06 (0.0003)                                | 0.981   | <b>-0.24 (0.012)</b> | <b>0.046</b> | 1.19e-07 (6.07e-08)         | 0.056        |
| Naive B cells                                    | 0.0001 (0.0002)                               | 0.515        | -0.004 (0.004)        | 0.307        | -0.024 (0.025)      | 0.333   | 0.000022 (0.00008)                               | 0.775   | -0.0039 (0.0051)     | 0.444        | <b>-5.65e-08 (2.25e-08)</b> | <b>0.015</b> |
| Resting MBCs                                     | 0.0003 (0.0004)                               | 0.493        | 0.007 (0.021)         | 0.749        | 0.034 (0.069)       | 0.623   | 0.000037 (0.00033)                               | 0.911   | 0.00015 (0.023)      | 0.995        | <b>3.05e-07 (5.57e-08)</b>  | <b>0.000</b> |
| Unswitched MBCs                                  | 0.0005 (0.0004)                               | 0.204        | 0.013 (0.023)         | 0.615        | 0.007 (0.093)       | 0.932   | -0.00004 (0.0003)                                | 0.903   | 0.016 (0.024)        | 0.513        | <b>2.47e-07 (9.39e-08)</b>  | <b>0.011</b> |
| Switched MBCs                                    | -0.0004 (0.0004)                              | 0.365        | 0.005 (0.018)         | 0.766        | 0.0755 (0.076)      | 0.322   | -0.000127 (0.00026)                              | 0.629   | -0.012 (0.019)       | 0.522        | <b>1.39e-07 (6.37e-08)</b>  | <b>0.034</b> |
| Atypical MBCs                                    | -0.0003 (0.0004)                              | 0.347        | 0.017 (0.020)         | 0.400        | 0.0386 (0.085)      | 0.650   | -0.00012 (0.0003)                                | 0.701   | 0.0006 (0.021)       | 0.772        | <b>2.72e-07 (1.03e-07)</b>  | <b>0.011</b> |
| Activated B cells                                | 0.0004 (0.0003)                               | 0.237        | 0.004 (0.018)         | 0.844        | 0.0275 (0.074)      | 0.710   | 0.00028 (0.0003)                                 | 0.407   | -0.0082 (0.0185)     | 0.658        | <b>2.06e-07 (5.55e-08)</b>  | <b>0.001</b> |
| Plasmablasts                                     | 0.0004 (0.0007)                               | 0.595        | -0.029 (0.029)        | 0.325        | 0.0003 (0.111)      | 0.998   | -0.0003 (0.0005)                                 | 0.599   | -0.037 (0.033)       | 0.261        | <b>5.38e-07 (8.96e-08)</b>  | <b>0.000</b> |
| <b>Infants' memory B cell recall responses</b>   |                                               |              |                       |              |                     |         |                                                  |         |                      |              |                             |              |
| PCPs                                             | -0.0006 (0.0013)                              | 0.658        | -0.150 (0.122)        | 0.232        | 0.354 (0.488)       | 0.473   | 0.001 (0.0035)                                   | 0.772   | .0041825 .084301     | 0.961        | -3.82e-07 1.31e-06          | 0.773        |
| Measles                                          | -0.0009 (0.005)                               | 0.868        | -0.127 (0.201)        | 0.535        | 0.223 (0.629)       | 0.721   | 0.0015 (0.0039)                                  | 0.702   | -0.054768 .1267134   | 0.670        | 1.61e-06 1.86e-06           | 0.396        |
| TT                                               | 0.0034 (0.0041)                               | 0.414        | -0.025 (0.171)        | 0.887        | 0.443 (0.843)       | 0.603   | 0.003 (0.0038)                                   | 0.370   | -0.0327105 .1291981  | 0.802        | 1.10e-06 1.03e-06           | 0.296        |
| Diphtheria                                       | 0.0004 (0.0025)                               | 0.875        | 0.111 (0.086)         | 0.209        | -0.026 (0.601)      | 0.966   | 0.002 (0.0027)                                   | 0.373   | 1102837 .0486993     | 0.031        | 3.51e-07 7.64e-07           | 0.650        |
| Total IgG                                        | 0.047 (0.085)                                 | 0.585        | 1.555 (3.43)          | 0.654        | -3.890 (13.51)      | 0.775   | 0.0311 (0.0565)                                  | 0.586   | 2.886192 3.688366    | 0.440        | -9.64e-06 .0000182          | 0.601        |
| <b>Infants' antigen specific antibody levels</b> |                                               |              |                       |              |                     |         |                                                  |         |                      |              |                             |              |
| PCPs                                             | -0.0005 (0.0006)                              | 0.366        | -0.0177 (0.033)       | 0.598        | -0.139 (0.139)      | 0.321   | -0.0002 (0.0005)                                 | 0.664   | -0.040 (0.043)       | 0.359        | 5.63e-07 5.46e-07           | 0.308        |
| Measles                                          | -0.001 (0.0008)                               | 0.227        | -0.0311 (0.0422)      | 0.464        | -0.0148 (0.177)     | 0.934   | -0.0006 (0.0007)                                 | 0.373   | -0.049 (0.055)       | 0.372        | -1.63e-07 7.05e-07          | 0.819        |
| TT                                               | -0.0004 (0.0007)                              | 0.618        | -0.056 (0.040)        | 0.167        | -0.274 (0.167)      | 0.108   | 0.00016 (0.0007)                                 | 0.815   | -0.043 (0.052)       | 0.415        | 3.80e-08 6.68e-08           | 0.955        |
| Diphtheria                                       | -0.0014 (0.00096)                             | 0.149        | -0.009 (0.049)        | 0.848        | 0.080 (0.204)       | 0.699   | -0.00092 (0.0009)                                | 0.339   | -0.011 (0.064)       | 0.869        | 9.71e-07 7.20e-07           | 0.186        |
| HiB                                              | -0.0008 (0.0014)                              | 0.561        | -0.071 (0.065)        | 0.291        | 0.0219 (0.307)      | 0.944   | 0.0007 (0.0014)                                  | 0.637   | -0.0179 (0.094)      | 0.094        | -1.58e-06 7.70e-07          | 0.054        |
| RSV                                              | 0.0002 (0.0014)                               | 0.914        | 0.061 (0.066)         | 0.362        | 0.226 (0.285)       | 0.435   | -0.00029 (0.0013)                                | 0.818   | 0.183 (0.086)        | 0.042        | -1.27e-07 9.50e-07          | 0.894        |
| Total IgG                                        | -0.0002 (0.0007)                              | 0.789        | -0.0006 (0.036)       | 0.986        | 0.186 (0.149)       | 0.219   | 0.0003 (0.00061)                                 | 0.593   | 0.0019 (0.046)       | 0.967        | -1.52e-07 5.91e-07          | 0.798        |

4

- 5 Linear regression models were used to describe the association between maternal
- 6 parameters taken within four months after the infant's birth (CD4 counts, body mass

1 index (BMI) and duration on Highly active antiretroviral therapy (HAART)) and at  
2 recruitment (CD4 counts, BMI and viral load), with the infant's immunological outcomes.  
3 The Beta co-efficient and standard error are indicated. P values less than 0.05 were  
4 considered significant and indicated in bold. MBC; memory B cells, PCPs; pneumococcal  
5 capsular polysaccharides, TT; Tetanus toxoid, HiB; haemophilus influenzae type b, RSV;  
6 Respiratory Syncytial virus  
7  
8
